# Supplementary material for: A novel method to modify the color of VO2-based thermochromic smart films by solution-processed VO2@SiO2@Au core–shell nanoparticles
Source: Royal Society of Chemistry journal article supplement (doi:10.1039/c6ra07594k), 2016-01-01
Supplement: c6ra07594k1.pdf [file c6ra07594k1.pdf]

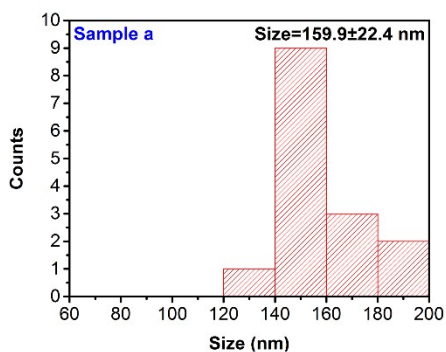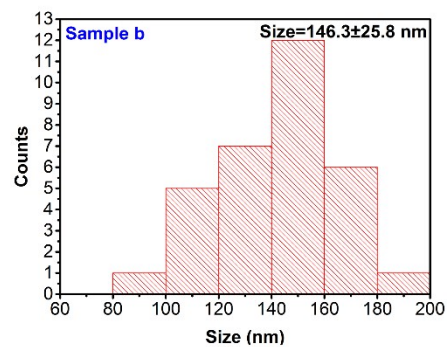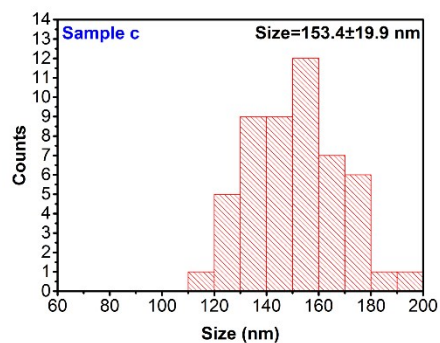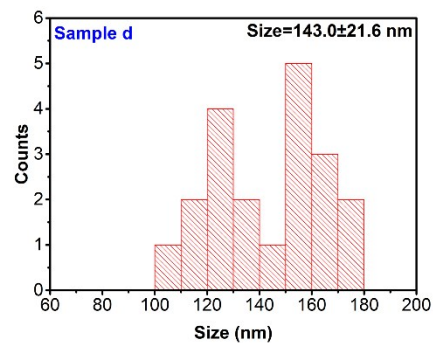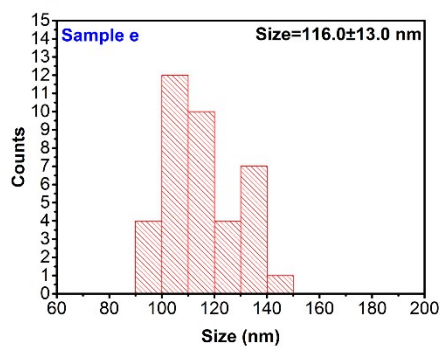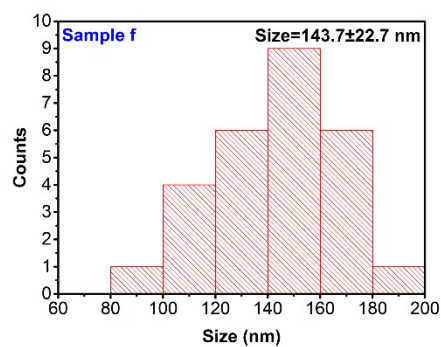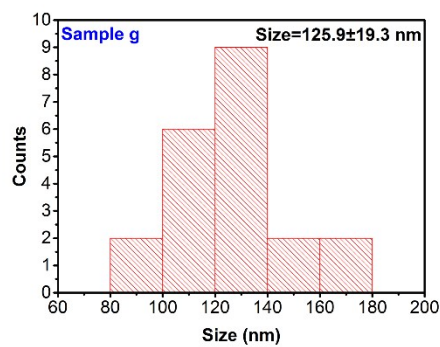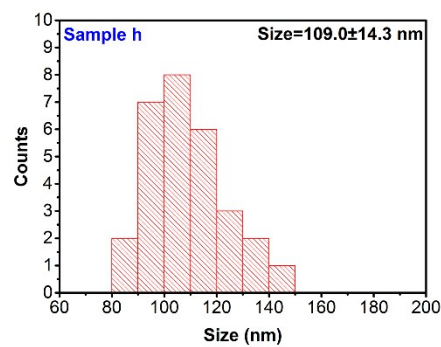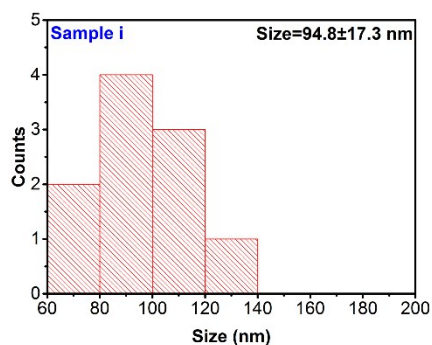

**Fig. S1.** The size distribution plots for the different VO<sub>2</sub>@SiO<sub>2</sub> samples (a-i) in Figure 2.

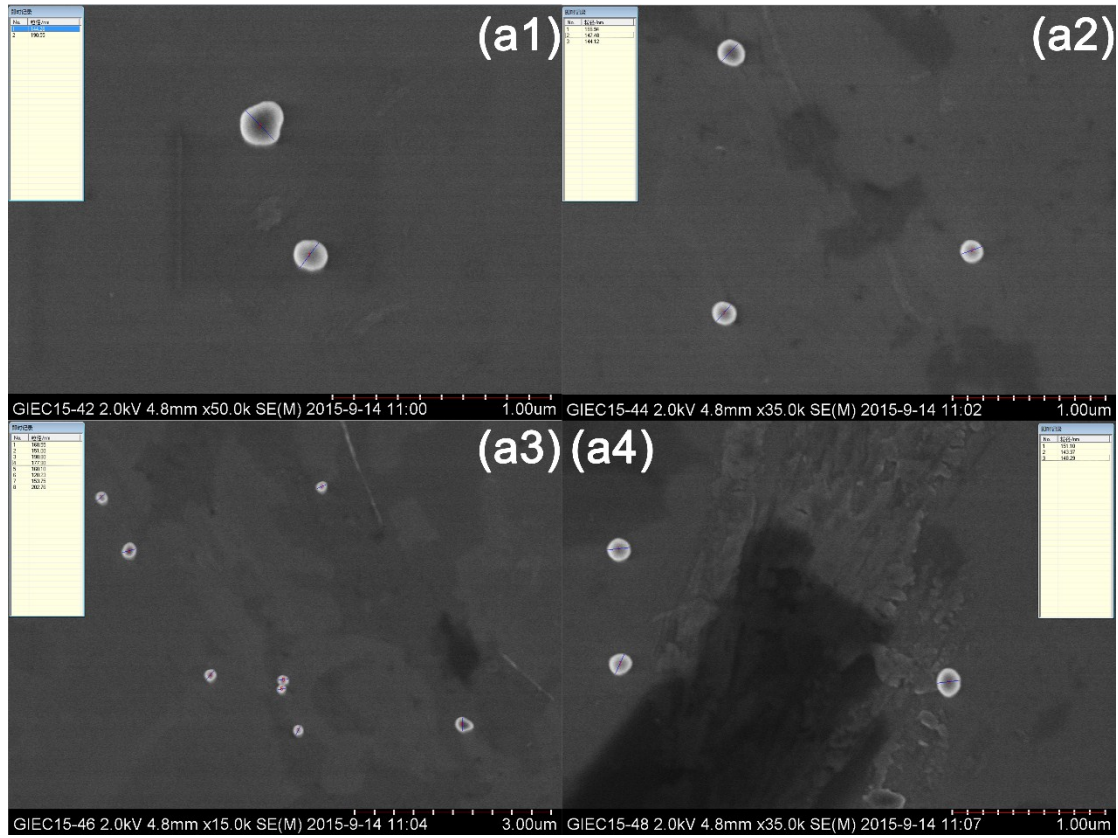

**Fig. S2.** The SEM picture of VO<sub>2</sub>@SiO<sub>2</sub> Sample a after size measuring.

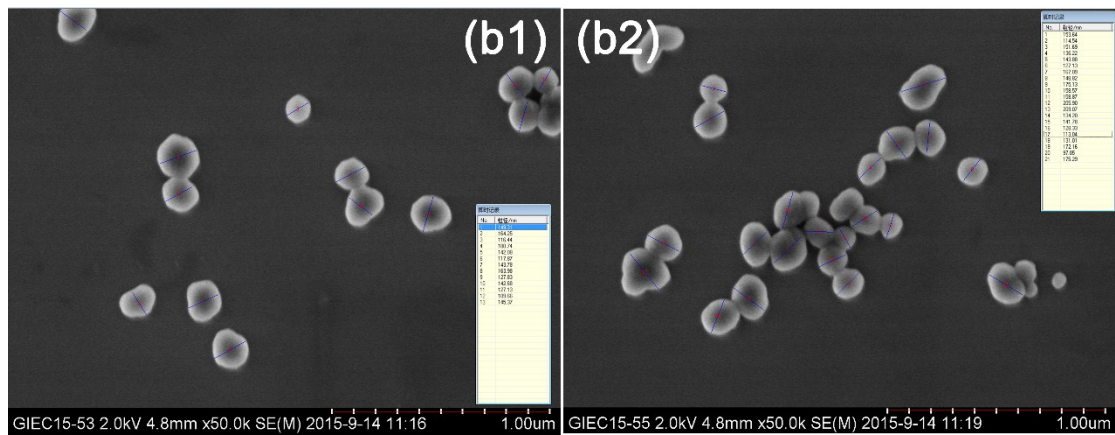

**Fig. S3.** The SEM picture of VO<sub>2</sub>@SiO<sub>2</sub> Sample b after size measuring.

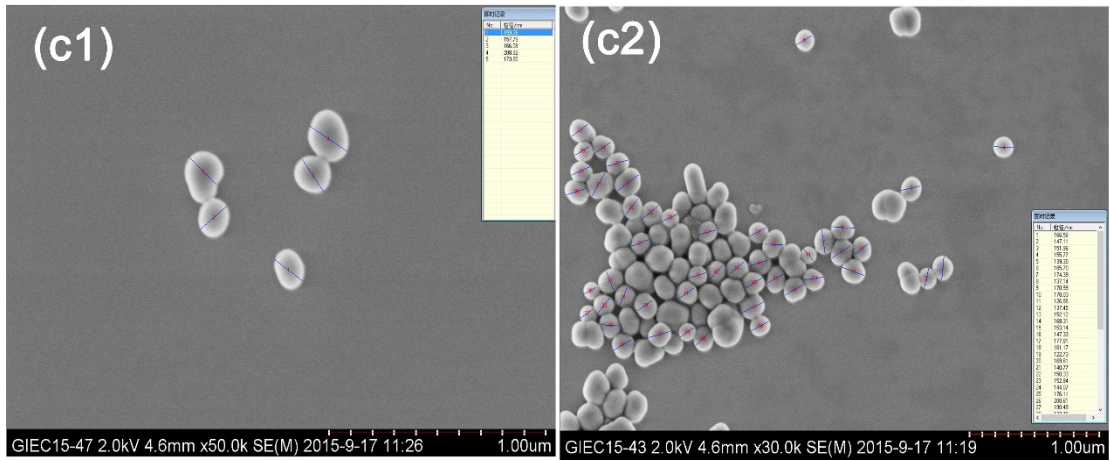

**Fig. S4.**The SEM picture of VO<sub>2</sub>@SiO<sub>2</sub> Sample c after size measuring.

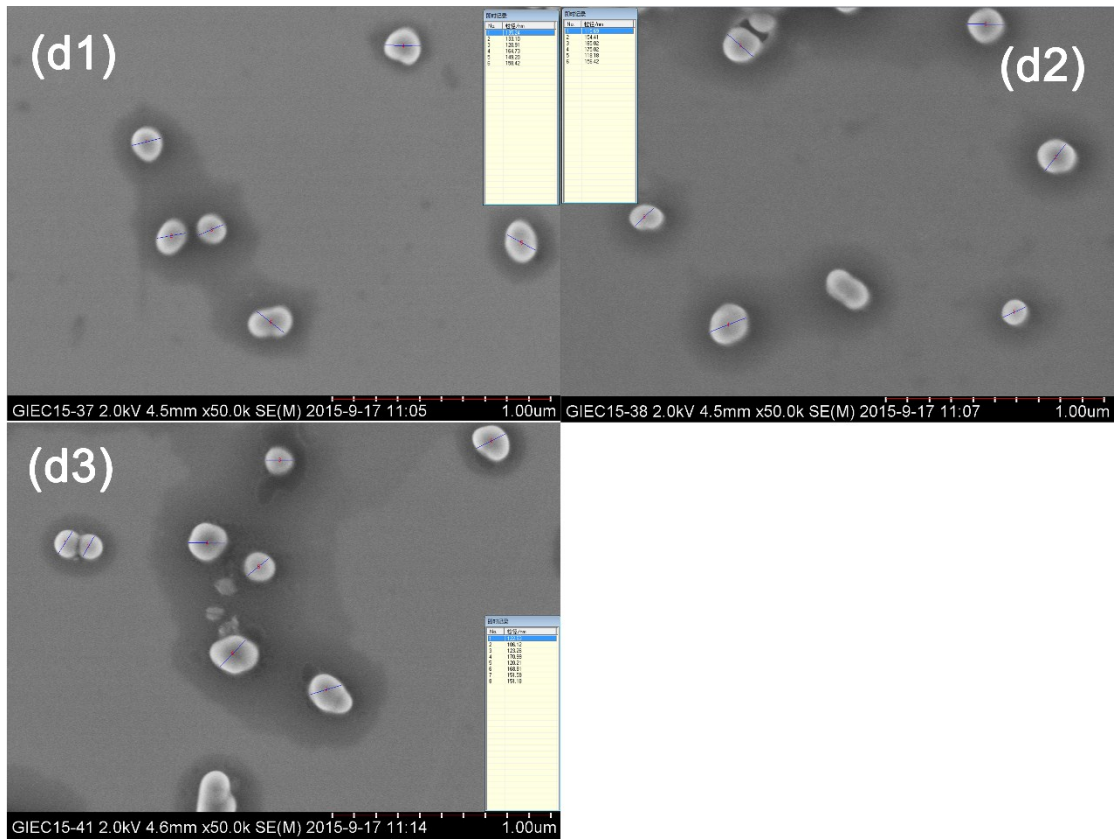

**Fig. S5.**The SEM picture of VO<sub>2</sub>@SiO<sub>2</sub> Sample d after size measuring.

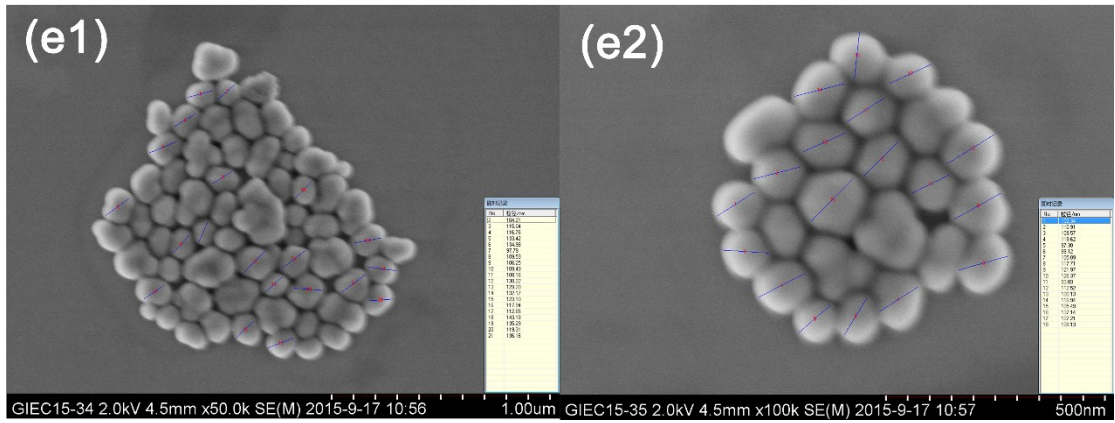

**Fig. S6.**The SEM picture of VO<sub>2</sub>@SiO<sub>2</sub> Sample e after size measuring.

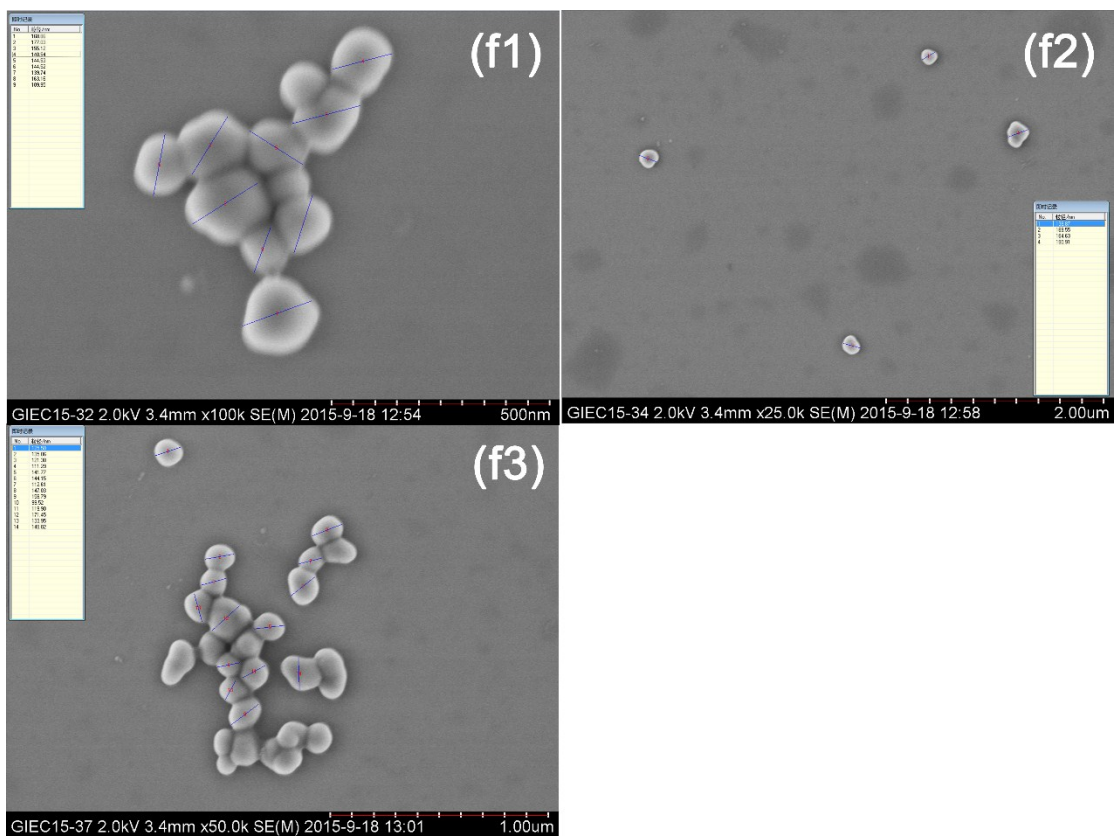

**Fig. S7.**The SEM picture of VO<sub>2</sub>@SiO<sub>2</sub> Sample a after size measuring.

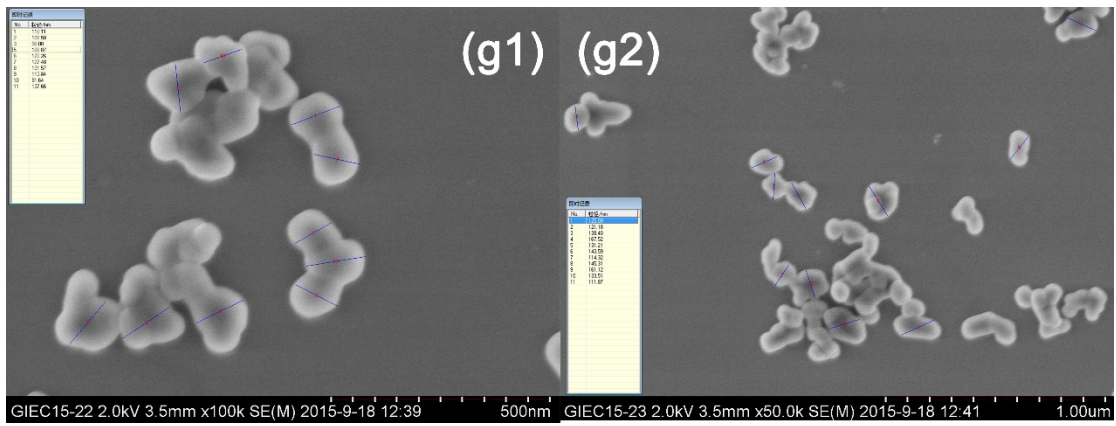

**Fig. S8.**The SEM picture of VO<sub>2</sub>@SiO<sub>2</sub> Sample g after size measuring.

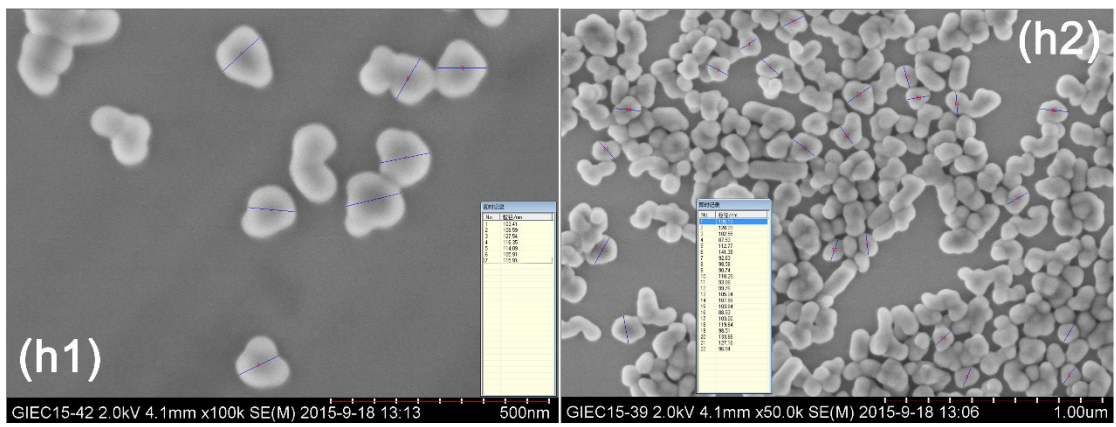

**Fig. S9.**The SEM picture of VO<sub>2</sub>@SiO<sub>2</sub> Sample h after size measuring.

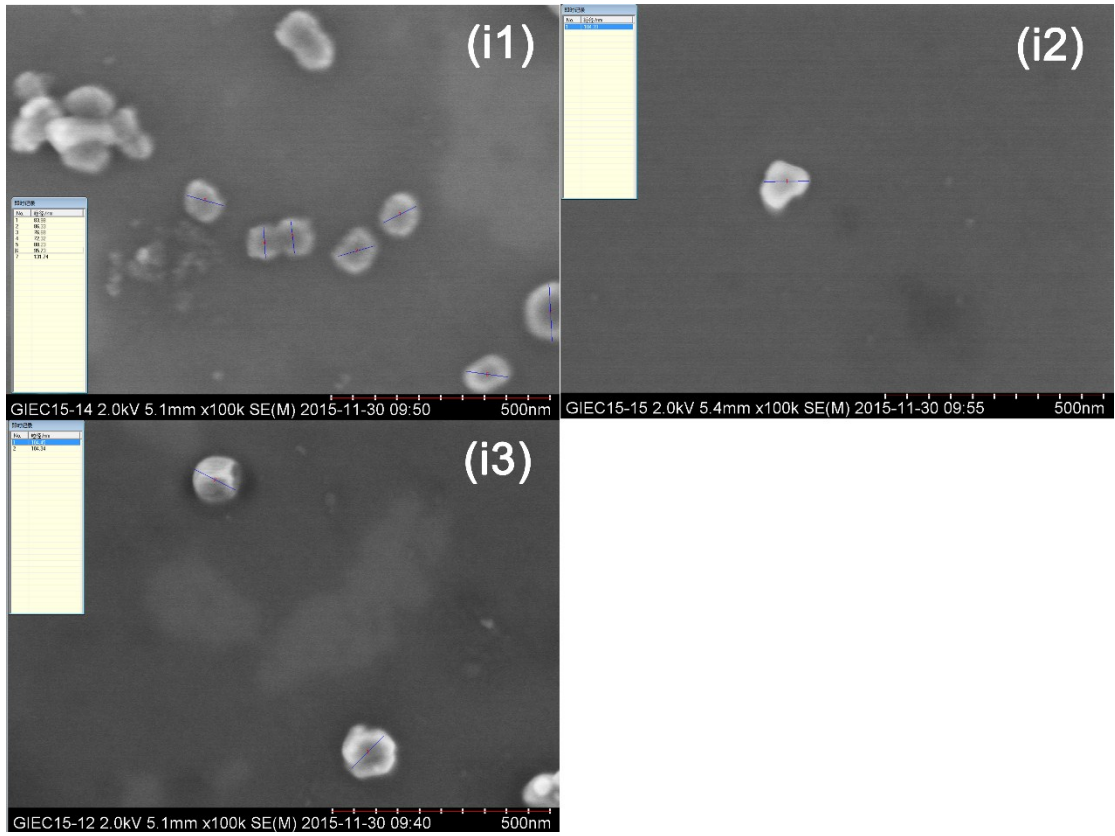

**Fig. S10.** The SEM picture of  $\text{VO}_2@SiO_2$  Sample i after size measuring.

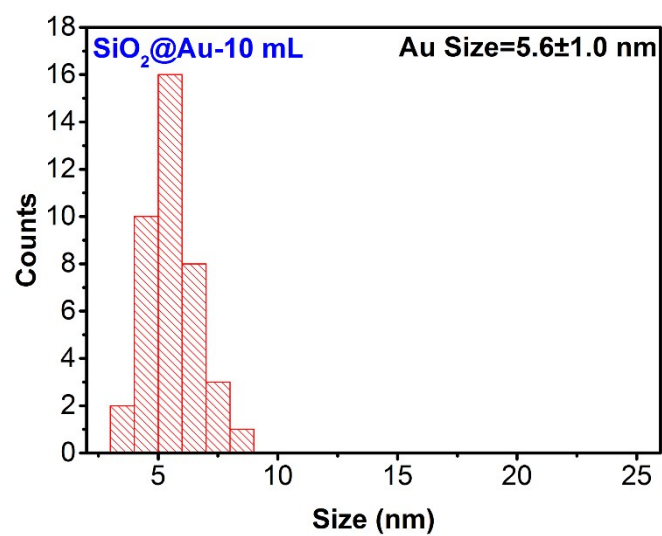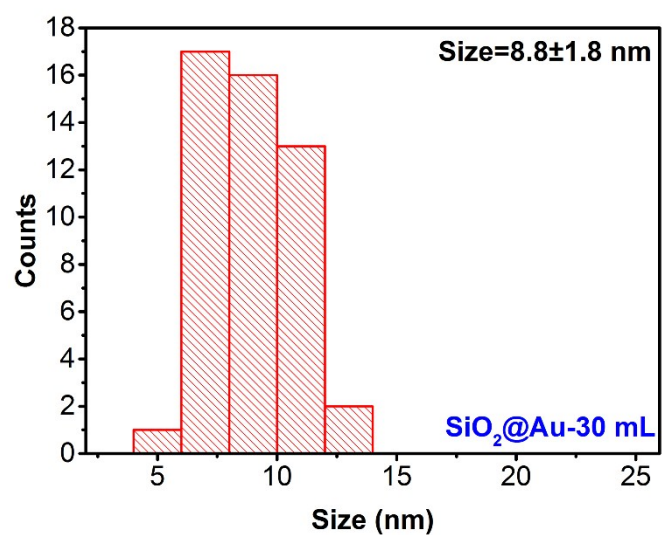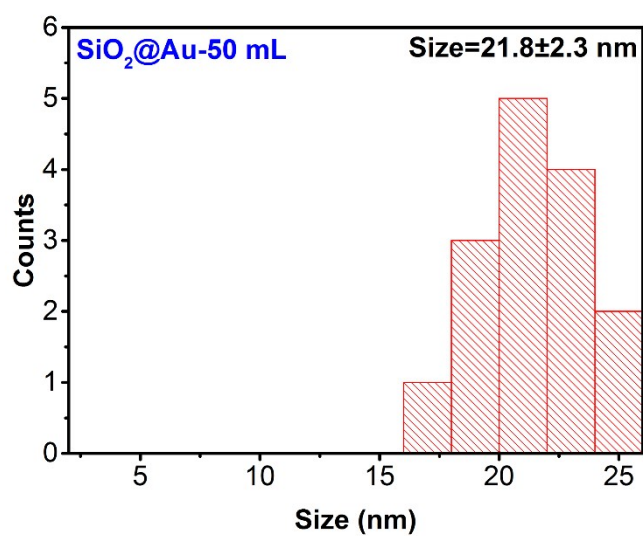

**Fig. S11.** The size distribution plots of Au particles on the SiO<sub>2</sub>@Au for the different samples in Figure 5.
